# Supplementary material for: RNAi-Mediated Knockdown of Acidic Ribosomal Stalk Protein P1 Arrests Egg Development in Adult Female Yellow Fever Mosquitoes, Aedes aegypti
Source: MDPI journal article supplement (doi:10.3390/insects15020084), 2024-01-24
Supplement: s1 [file s1]

**Table S1. List of proteins identified after Yeast-Two Hybrid screen**

| <b>S. NO.</b> | <b>Identified potential prey interactors</b>                                        | <b>NCBI Accession</b> |
|---------------|-------------------------------------------------------------------------------------|-----------------------|
| <b>1.</b>     | PREDICTED: Aedes aegypti 60S acidic ribosomal protein P1 (LOC5565839), mRNA         | XM_001650143.2        |
| <b>2.</b>     | PREDICTED: Aedes aegypti 60S acidic ribosomal protein P1-like (LOC110678133)        | XM_021850740.1        |
| <b>3.</b>     | PREDICTED: Aedes aegypti 60S acidic ribosomal protein P1 (LOC5578368), mRNA         | XM_001656889.2        |
| <b>4.</b>     | Aedes aegypti clone AE-294 60S acidic ribosomal protein P1 mRNA, complete cds       | DQ440047.1            |
| <b>5.</b>     | PREDICTED: Aedes aegypti 60S acidic ribosomal protein P1 (LOC5577349), mRNA         | XM_001656376.2        |
| <b>6.</b>     | PREDICTED: Aedes aegypti 60S acidic ribosomal protein P1 (LOC5578249), partial mRNA | XM_001663729.2        |

**Figures S1- S3.** The following page contains Western blot images used in main figures without cropping, color removal, and brightness/ contrast correction. The label above each image contains a reference to the main text figure where the image is included.

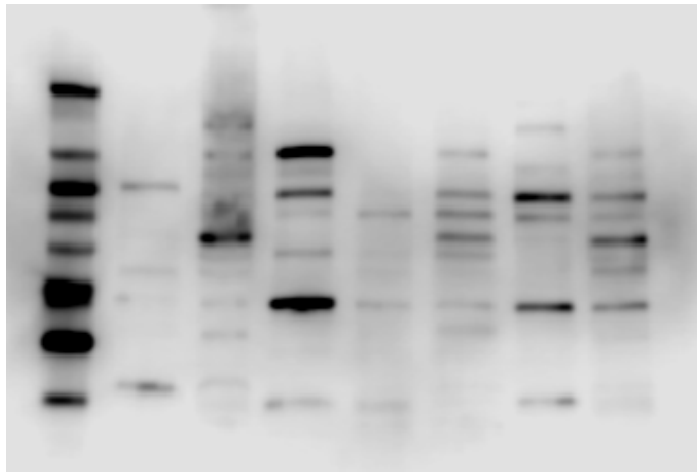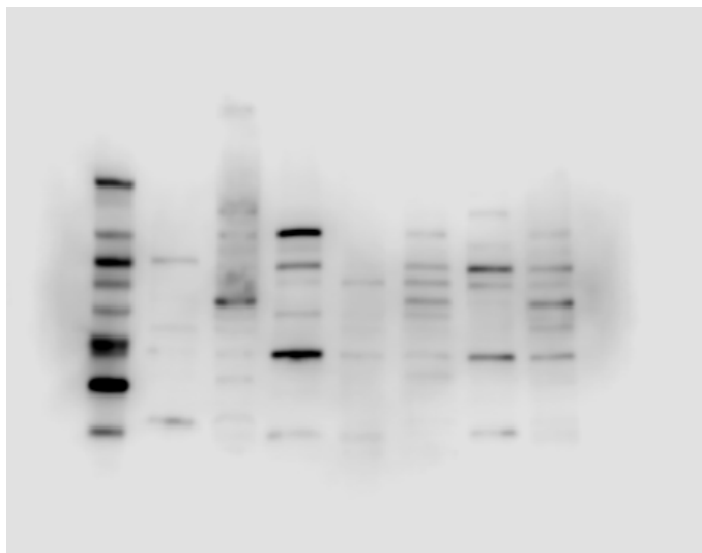

**Figure S1. P1 expression in different mosquito organs and tissues tested (Fig. 3 b).**

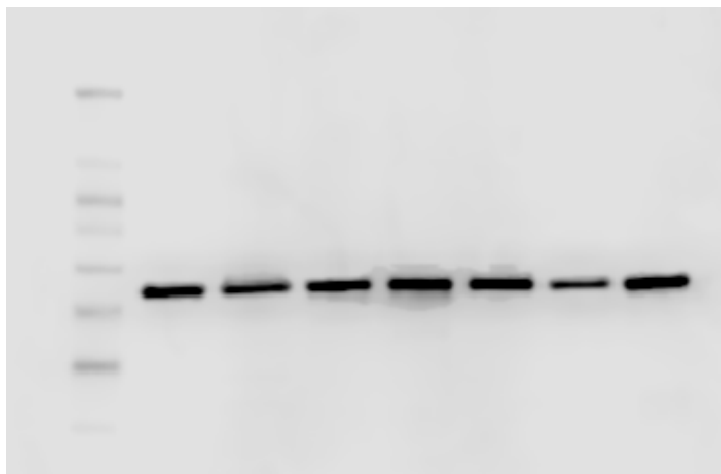

**Figure S2. Image for Actin control (Fig. 3 b)**

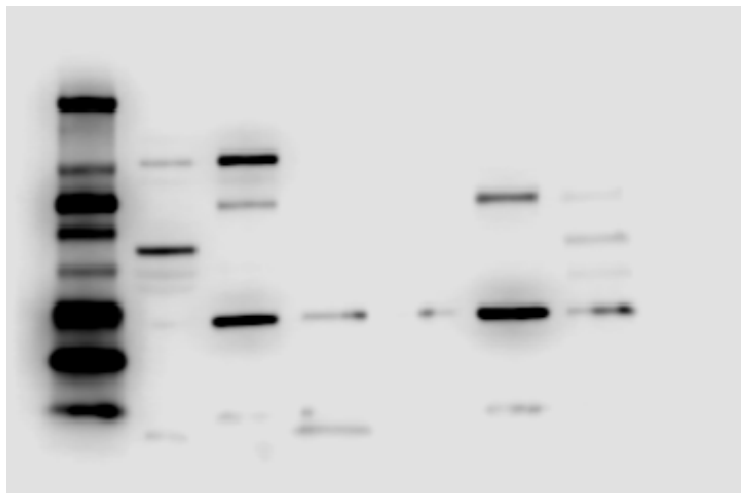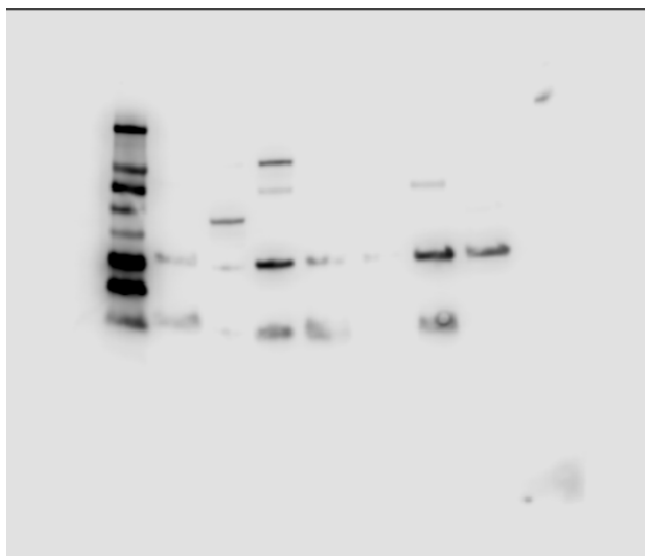

**Figure S3. P1 expression western blot for different mosquito organs tested ( Thorax, Fat Body, Mid Gut, Malpighian Tubules, Ovary, Head)**

**Table S2. Mosquito survival data**

| # mosquitoes dead (not cumulative) |                        |               |               |                         |               |               |                            |                             |
|------------------------------------|------------------------|---------------|---------------|-------------------------|---------------|---------------|----------------------------|-----------------------------|
| Time after dsRNA injection (hours) | GFP injected (control) |               |               | P1 injected (treatment) |               |               | AVG GFP injected (control) | AVG P1 injected (treatment) |
|                                    | R1 (66 total)          | R2 (68 total) | R3 (58 total) | R1 (66 total)           | R2 (70 total) | R3 (60 total) |                            |                             |
| 0                                  | 0                      | 0             | 0             | 0                       | 0             | 0             | 0                          | 0                           |
| 24                                 | 2                      | 7             | 1             | 5                       | 19            | 4             | 3.33                       | 9.33                        |
| 48                                 | 1                      | 4             | 2             | 2                       | 10            | 5             | 2.33                       | 5.66                        |
| 72                                 | 7                      | 3             | 2             | 16                      | 8             | 7             | 4                          | 10.33                       |
| 96                                 | 1                      | 2             | 0             | 3                       | 5             | 3             | 1                          | 3.66                        |
|                                    |                        |               |               |                         |               |               |                            |                             |
| # mosquitoes dead (cumulative)     |                        |               |               |                         |               |               |                            |                             |
| Time after dsRNA injection (hours) | GFP injected (control) |               |               | P1 injected (treatment) |               |               | AVG GFP injected (control) | AVG P1 injected (treatment) |
|                                    | R1 (66 total)          | R2 (68 total) | R3 (58 total) | R1 (66 total)           | R2 (70 total) | R3 (60 total) |                            |                             |
| 0                                  | 0                      | 0             | 0             | 0                       | 0             | 0             | 0                          | 0                           |
| 24                                 | 2                      | 7             | 1             | 5                       | 19            | 4             | 3.33                       | 9.33                        |
| 48                                 | 3                      | 11            | 3             | 7                       | 29            | 9             | 5.66                       | 15                          |
| 72                                 | 10                     | 14            | 5             | 23                      | 37            | 16            | 9.66                       | 25.33                       |
| 96                                 | 11                     | 16            | 5             | 26                      | 42            | 19            | 10.66                      | 29                          |
|                                    |                        |               |               |                         |               |               |                            |                             |
| # mosquitoes alive                 |                        |               |               |                         |               |               |                            |                             |
| Time after dsRNA injection (hours) | GFP injected (control) |               |               | P1 injected (treatment) |               |               | AVG GFP injected (control) | AVG P1 injected (treatment) |
|                                    | R1 (66 total)          | R2 (68 total) | R3 (58 total) | R1 (66 total)           | R2 (70 total) | R3 (60 total) |                            |                             |
| 0                                  | 66                     | 68            | 58            | 66                      | 70            | 60            | 64                         | 65.33                       |
| 24                                 | 64                     | 61            | 57            | 61                      | 51            | 56            | 60.66                      | 56                          |
| 48                                 | 63                     | 57            | 55            | 59                      | 41            | 51            | 58.33                      | 50.33                       |
| 72                                 | 56                     | 54            | 53            | 43                      | 33            | 44            | 54.33                      | 40                          |
| 96                                 | 55                     | 52            | 53            | 40                      | 28            | 41            | 53.33                      | 36.33                       |

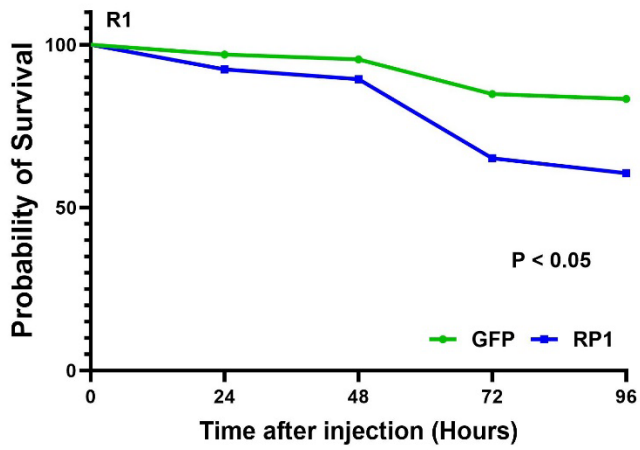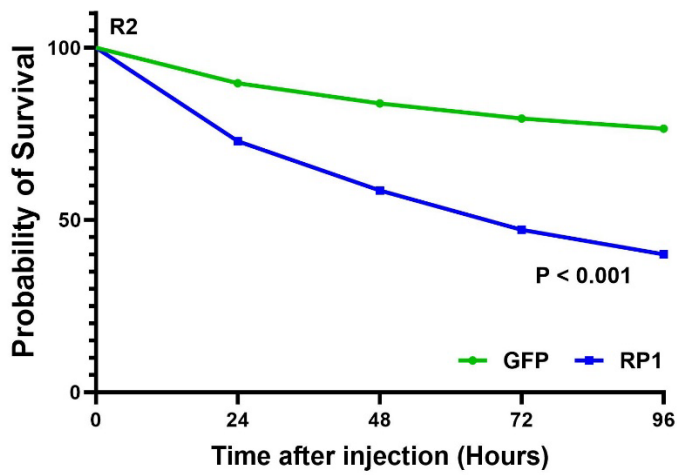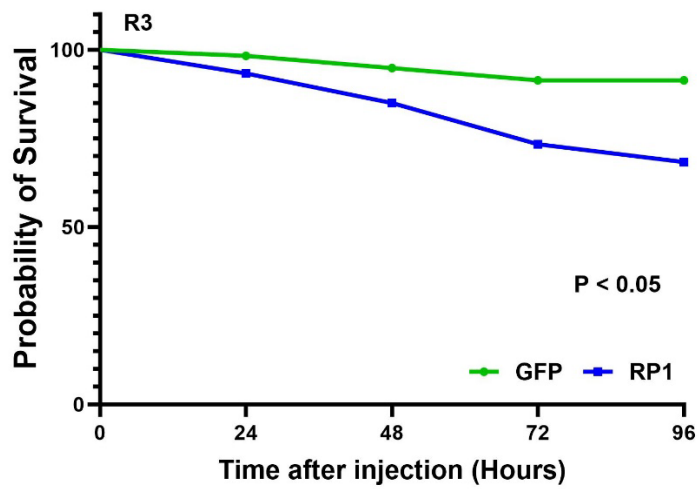

Figure S4. Survival Curve Replicates (R1-R3), (Supplemental figure for Figure 3.)

**Table S3. Measurements from mosquito ovaries post-injection and PBM**

| Ovary length( mm) |             |             |             |             |             |             |             |             |
|-------------------|-------------|-------------|-------------|-------------|-------------|-------------|-------------|-------------|
|                   | GFP         | P1          | GFP         | P1          | GFP         | P1          | GFP         | P1          |
|                   | 0 Hr        | 0 Hr        | 24 Hr       | 24 Hr       | 48 Hr       | 48 Hr       | 72 Hr       | 72 Hr       |
|                   | 0.9         | 0.7         | 2           | 1.3         | 2.8         | 1.4         | 3.1         | 1.6         |
|                   | 1           | 0.8         | 2.1         | 1.4         | 2.7         | 1.5         | 2.8         | 1.7         |
|                   | 0.7         | 0.7         | 1.9         | 1.3         | 2.8         | 1.4         | 3           | 1.4         |
|                   | 0.8         | 0.8         | 2.1         | 1.2         | 2.9         | 1.3         | 2.9         | 1.5         |
|                   | 0.9         | 0.8         | 2.1         | 1.3         | 3.1         | 1.7         | 2.8         | 1.3         |
|                   | 1           | 0.9         | 2           | 1.4         | 2.9         | 1.6         | 2.7         | 1.6         |
|                   | 0.8         | 0.8         | 2.1         | 1.5         | 2.8         | 1.4         | 2.8         | 1.4         |
|                   | 0.7         | 0.7         | 1.9         | 1.3         | 2.9         | 1.5         | 3           | 1.5         |
|                   | 0.8         | 0.8         | 2           | 1.3         | 2.7         | 1.3         | 2.6         | 1.3         |
|                   | 0.9         | 0.8         | 2.1         | 1.2         | 2.8         | 1.4         | 2.9         | 1.4         |
| <b>Average</b>    | <b>0.85</b> | <b>0.78</b> | <b>2.03</b> | <b>1.32</b> | <b>2.84</b> | <b>1.45</b> | <b>2.86</b> | <b>1.47</b> |

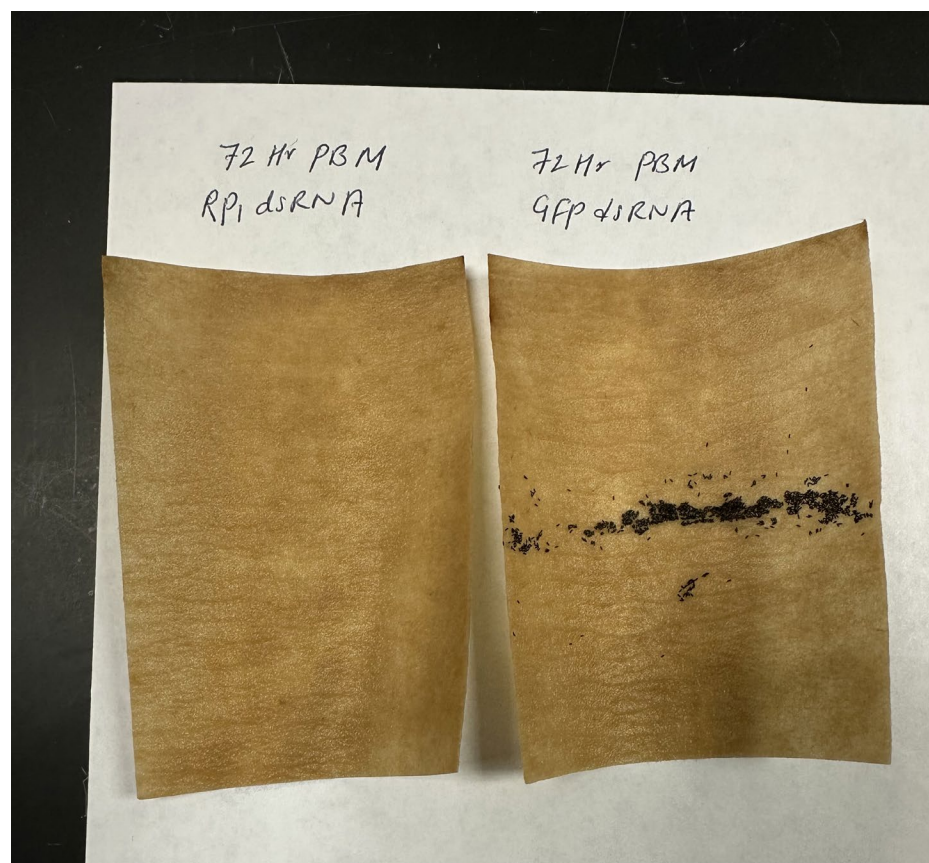

**Figure S5. Egg-laying paper with eggs and without eggs**
